# Supplementary material
Source: PubMed Central journal article supplement (PMC2683880)
Supplement: NIHMS103353-supplement-1_si_001.pdf [file NIHMS103353-supplement-1_si_001.pdf]

# Supporting Information

## Poly(ortho ester amides): Acid-labile Temperature-responsive Copolymers for Potential Biomedical Applications

*Rupeï Tang, R. Noelle Palumbo, Weihang Ji, Chun Wang\**

Department of Biomedical Engineering, University of Minnesota, 7-105 Hasselmo Hall, 312 Church Street S. E., Minneapolis, MN 55455

**RECEIVED DATE (to be automatically inserted after your manuscript is accepted if required according to the journal that you are submitting your paper to)**

\*Corresponding author. Telephone: 612-626-3990; Fax: 612-626-6583; E-mail: wangx504@umn.edu

## Supporting Information

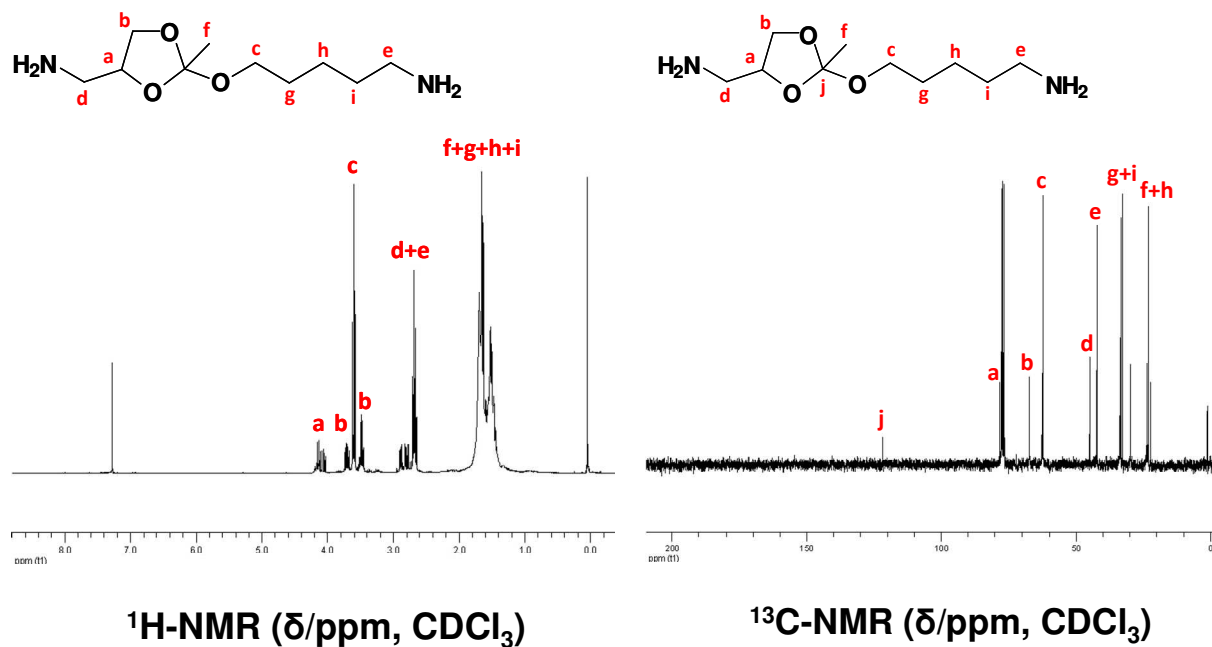

Figure S1.  $^1\text{H}$  and  $^{13}\text{C}$ -NMR spectra of ortho ester diamine monomer.

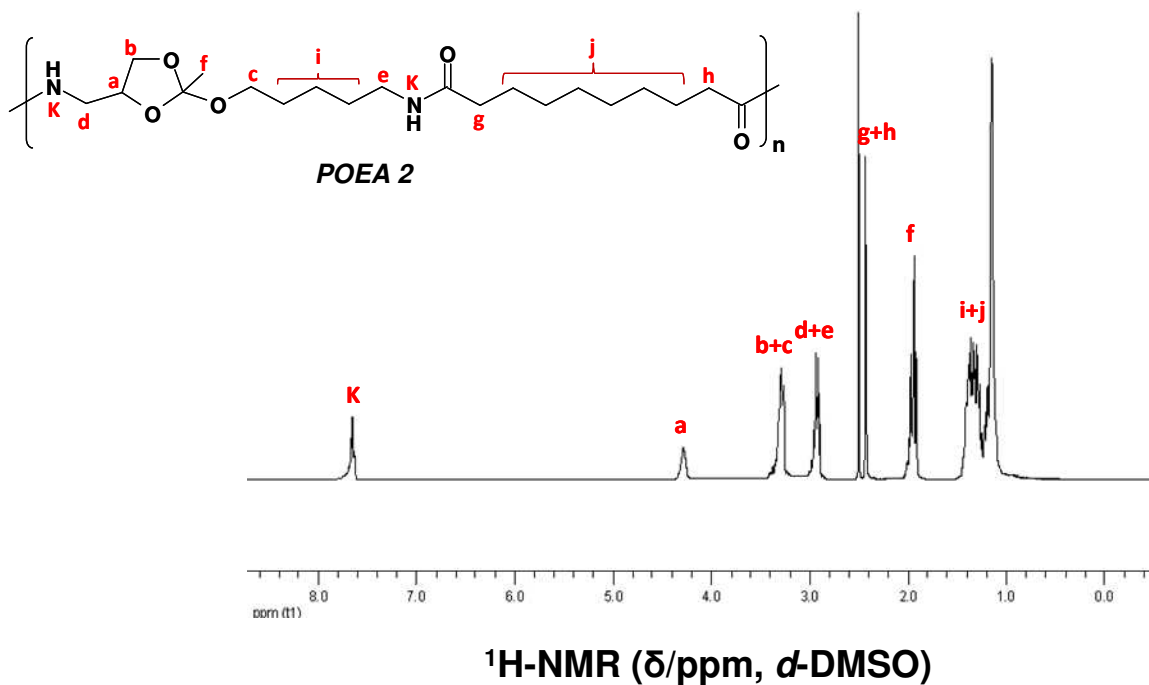

Figure S2. A representative  $^1\text{H}$  NMR spectrum of POEA.

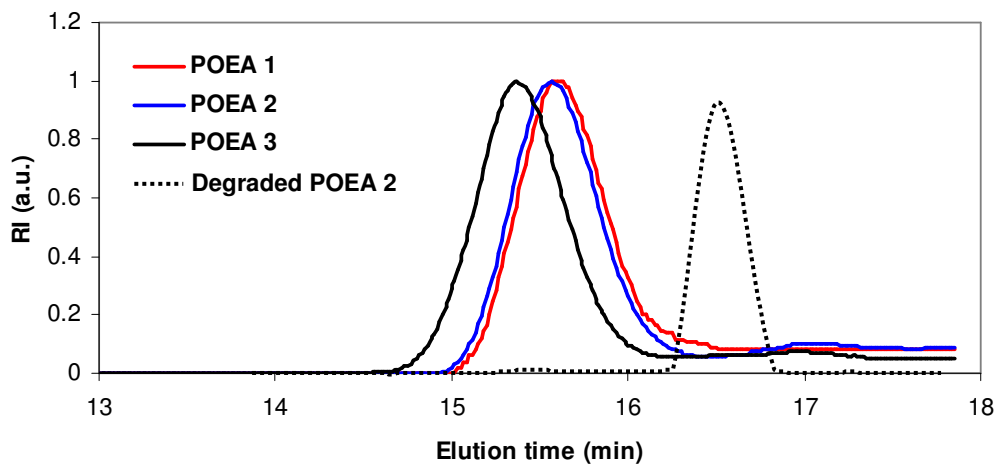

**Figure S3.** GPC profiles of POEA polymers and degraded POEA 2. Mobile phase: methanol/TEA (1%).

Molecular weight determination was based on PEG standards.

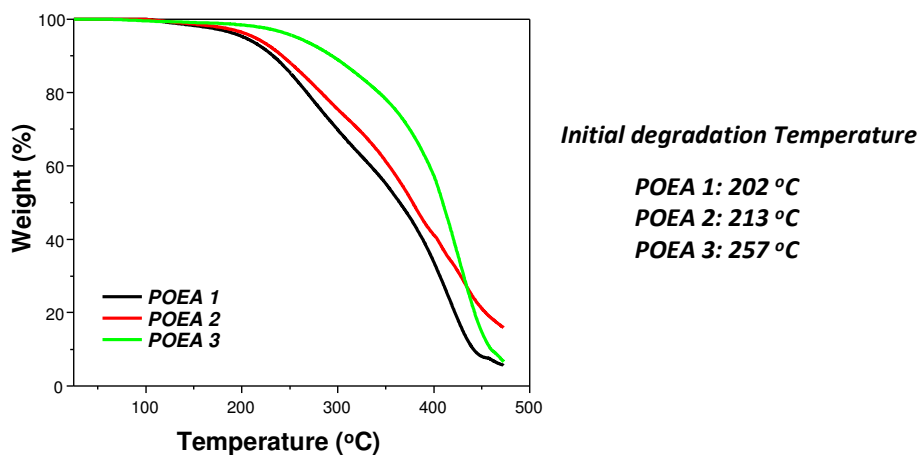

**Figure S4.** TGA thermograms of POEA polymers.

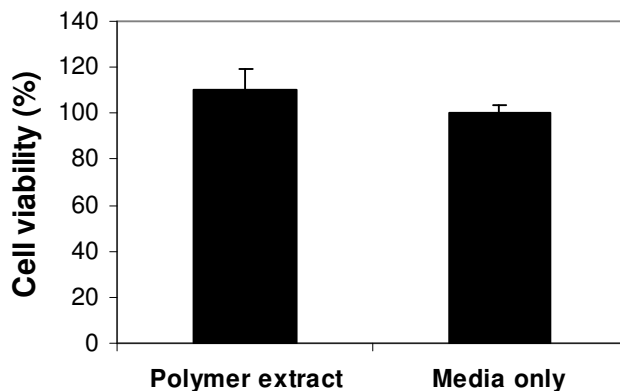

**Figure S5.** Viability of NIH3T3 fibroblasts in the presence of polymer extract (POEA 2).
